# Supplementary material
Source: MDPI journal article supplement (https://www.mdpi.com/2076-3417/10/1/349)
Supplement: s1 [file s1]

## Supplementary Materials

### Exploration of a extracellular polymeric substance from earthworm gut bacterium (*Bacillus licheniformis*) for bioflocculation and heavy metal removal potential

#### Isolation and characterization of the microorganism

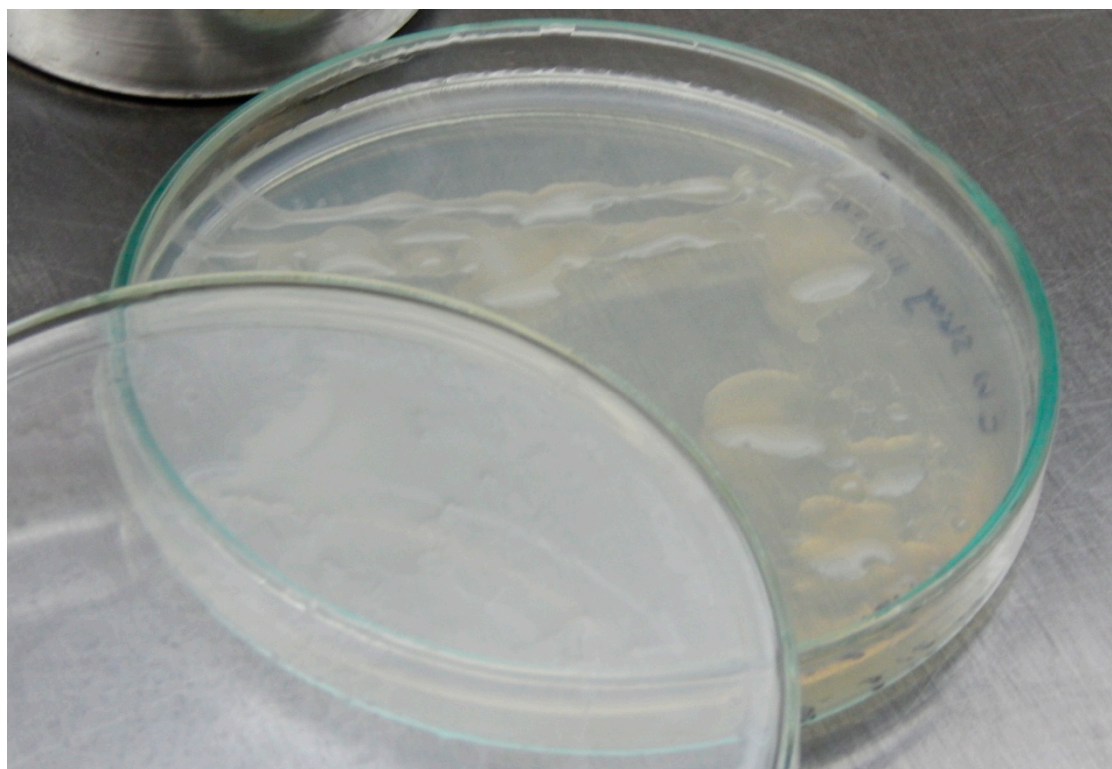

**Figure 1.** The isolation of the bacteria with a characteristic slimy, mucoid phenotypic nature from the gut of the earthworm *Metaphire posthuma*.

**Determination of Cu(II) and Zn(II) adsorption efficiency**

Calibration curve:

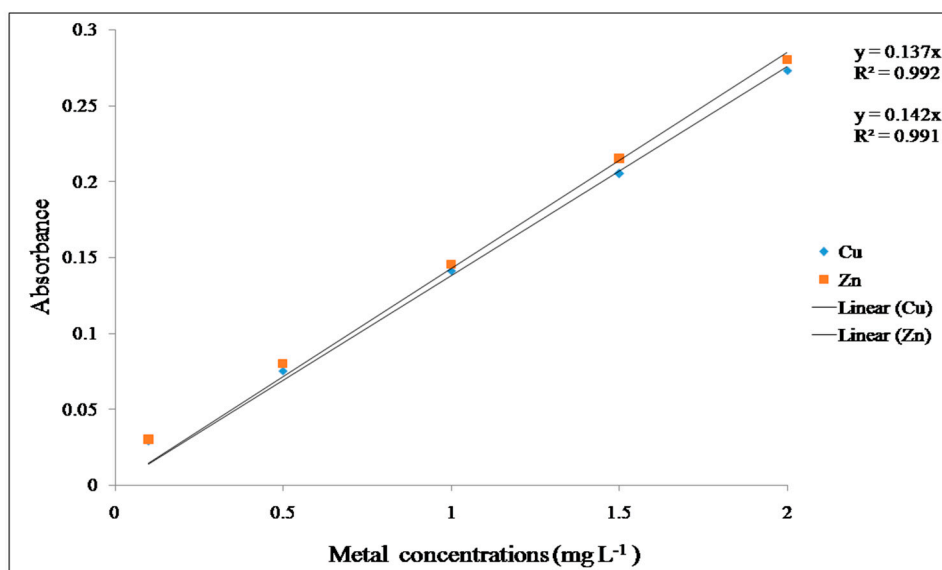

**Figure 2.** Atomic absorption spectroscopy (AAS) standard curve for metals Cu(II) and Zn(II).
